# Supplementary material
Source: publisher figshare collection journal article supplement (https://acs.figshare.com/ndownloader/files/30773959)
Supplement: Supplementary file 1 [file 30773959]

**SUPPORTING INFORMATION FOR**

**Packing biomolecules into Sierpiński triangles with global  
organizational chirality**

Chao Li<sup>1</sup>, Ruoning Li<sup>1</sup>, Zhen Xu<sup>1</sup>, Jie Li<sup>1</sup>, Xue Zhang<sup>1</sup>, Na Li<sup>1</sup>, Yajie Zhang<sup>1</sup>, Ziyong Shen<sup>1</sup>, Hao Tang<sup>2</sup>, Yongfeng Wang<sup>1,3\*</sup>

<sup>1</sup>Key Laboratory for the Physics and Chemistry of Nanodevices and Center for Carbon-based Electronics, Department of Electronics, Peking University, Beijing 100871, China.

<sup>2</sup>CEMES-CNRS, Boîte Postale 94347, 31055 Toulouse, France

<sup>3</sup>Beijing Academy of Quantum Information Sciences, Beijing 100193, China

\*Correspondence to: [yongfengwang@pku.edu.cn](mailto:yongfengwang@pku.edu.cn)

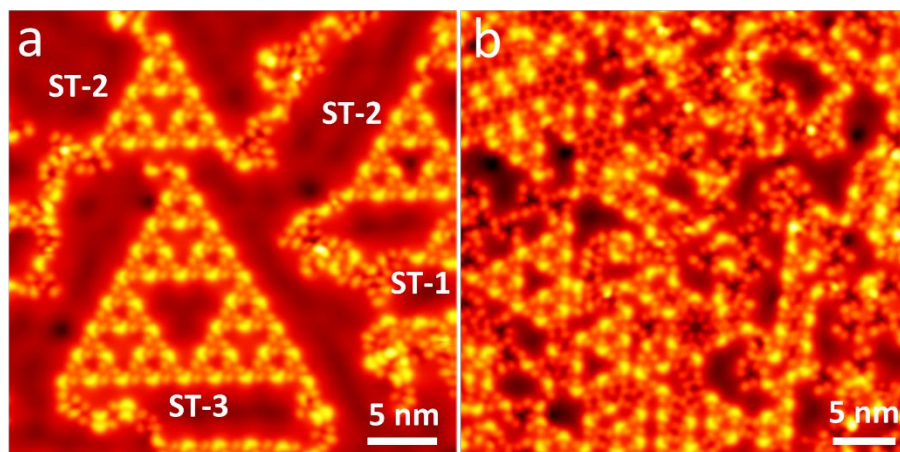

**Figure S1.** Large-scale STM images of STs formed by L-Trp and BPyB molecules at low (a) and high (b) molecular coverages. STs of high orders can only be formed at low molecular coverages. Imaging conditions: (a)  $V_{\text{bias}} = 0.1$  V,  $I = 0.1$  nA; (b)  $V_{\text{bias}} = 0.2$  V,  $I = 0.04$  nA.

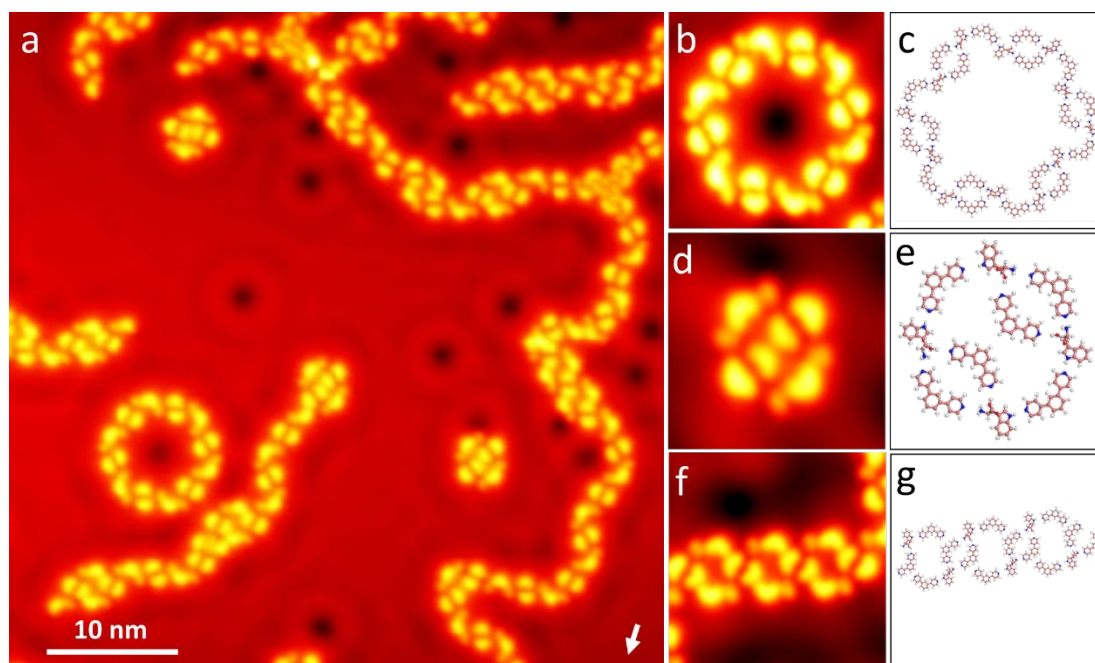

**Figure S2.** (a) When depositing BPyB and L-Trp molecules on Ag(111) at a ratio of BPyB to L-Trp larger than 2:1, ring-like structures, clusters and one-dimension chains form on Ag(111). (b-g) Enlarge images of different structures and their molecular models. Scanning parameters: (a)  $V = 0.1$  V,  $I = 0.04$  nA; (b, d, f):  $V = 10$  mV,  $I = 0.04$  nA.

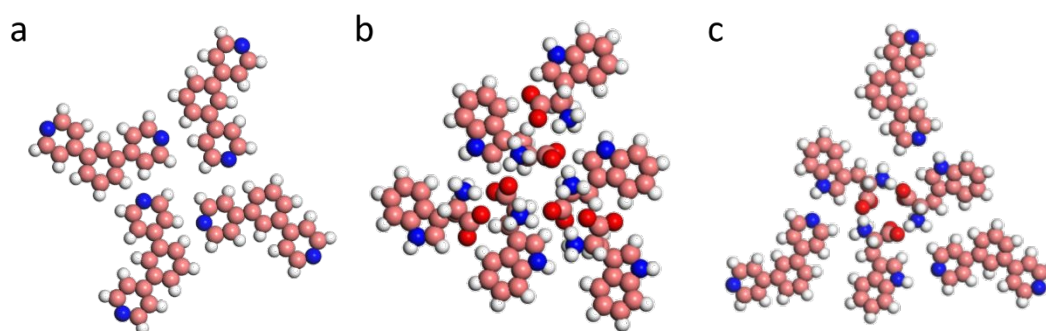

**Figure S3.** (a-c) Optimized gas-phase molecular structures of a BPyB tetramer, a L-Trp hexamer and a L-Trp-BPyB-ST-0.

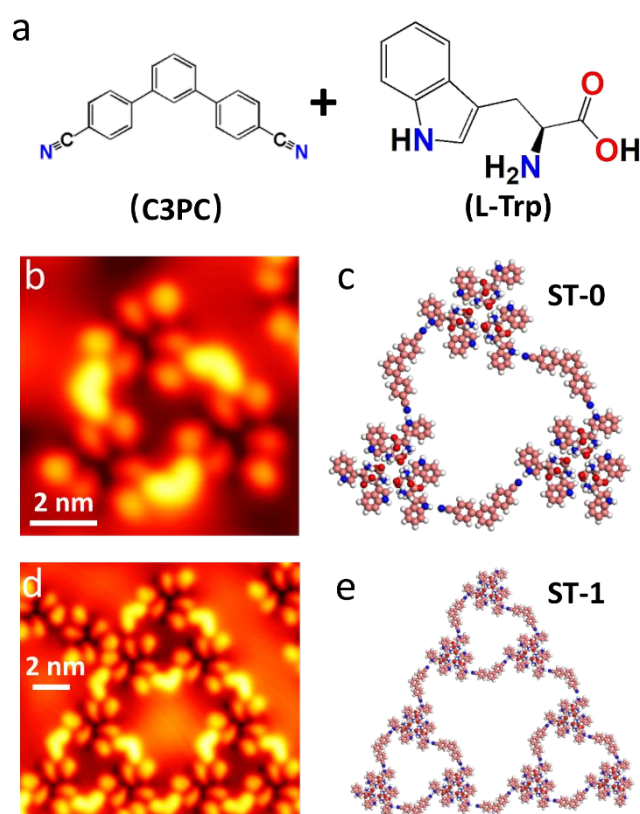

**Figure S4.** Sierpiński triangles constructed by L-Trp and C3PC. (a) The chemical structure of C3PC and L-Trp. (b-c) High-resolution STM image of L-Trp-C3PC-ST-0 and its corresponding molecular model. (d-e) STM image of L-Trp-C3PC-ST-1 and its molecular model. Imaging conditions: (b)  $V_{\text{bias}} = 10 \text{ mV}$ ,  $I = 0.04 \text{ nA}$ ; (d)  $V_{\text{bias}} = 50 \text{ mV}$ ,  $I = 0.04 \text{ nA}$ .
